# Supplementary material
Source: PubMed Central journal article supplement (PMC5289666)
Supplement: ADVS-3-1500366-s001.pdf [file ADVS-3-1500366-s001.pdf]

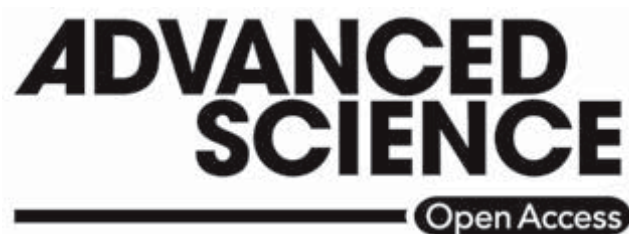

## Supporting Information

for *Adv. Sci.*, DOI: 10.1002/advs. 201500366

Fast-Rate Capable Electrode Material with Higher Energy Density than  $\text{LiFePO}_4$ : 4.2V  $\text{LiVPO}_4\text{F}$  Synthesized by Scalable Single-Step Solid-State Reaction

*Minkyung Kim, Seongsu Lee, and Byoungwoo Kang\**

## Supporting Information

## Fast rate capable electrode material with higher energy density than LiFePO<sub>4</sub>: 4.2V LiVPO<sub>4</sub>F synthesized by scalable single-step solid-state reaction

Minkyung Kim, Seongsu Lee and Byoungwoo Kang\*

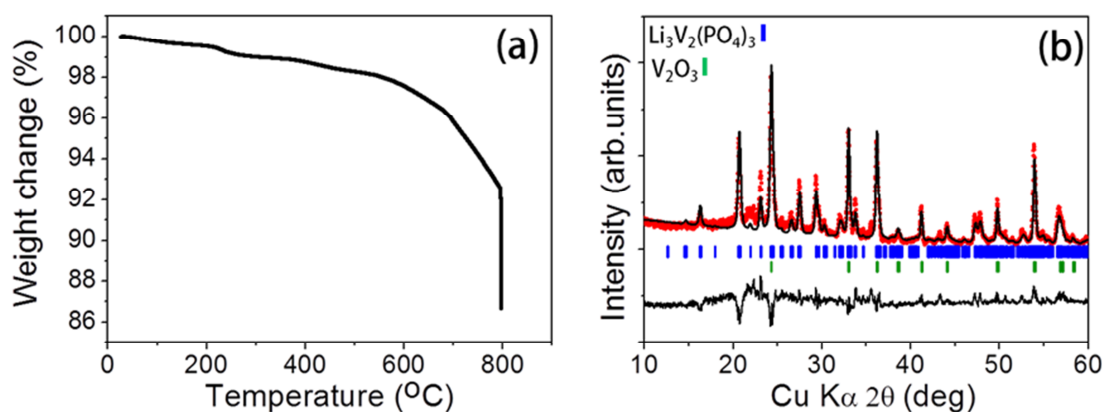

**Figure S1.** (a) TGA analysis of as-prepared LiVPO<sub>4</sub>F up to 800 °C at 5 Kmin<sup>-1</sup> heating rate and hold at 800 °C for one hour under argon atmosphere (b) XRD pattern of the decomposed product after TGA test.

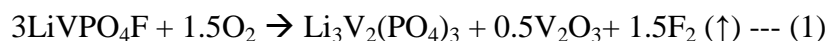

The weight change of LiVPO<sub>4</sub>F in TGA was ~ 13wt% that was similar with that of the reaction (1).

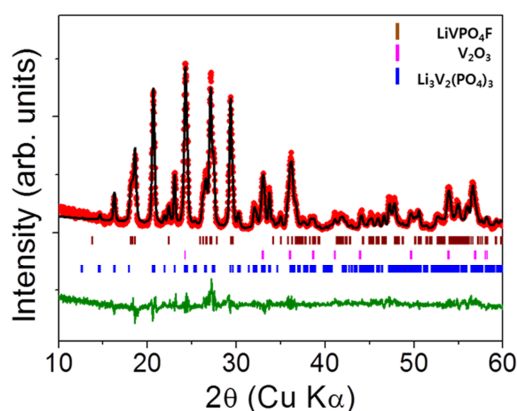

**Figure S2.** XRD pattern of the sample synthesized by the single-step solid-state reaction at 700 °C with the mixture of precursors (LiF, V<sub>2</sub>O<sub>5</sub>, and NH<sub>4</sub>H<sub>2</sub>PO<sub>4</sub>). The resulting sample was composed of LiVPO<sub>4</sub>F and impurity phases, Li<sub>3</sub>V<sub>2</sub>(PO<sub>4</sub>)<sub>3</sub> and V<sub>2</sub>O<sub>3</sub>.

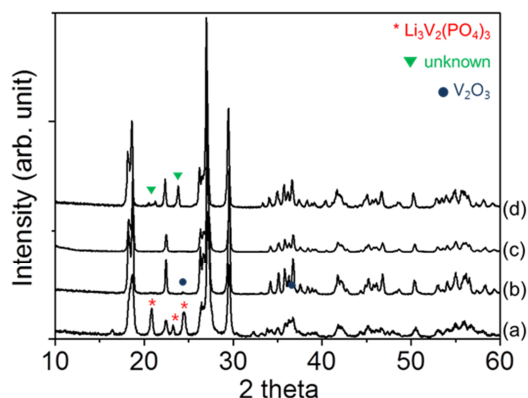

**Figure S3.** X-ray diffraction patterns of the samples synthesized with different amount of PTFE in the mix of precursors (a) 5 wt% (b) 15 wt% (c) 25 wt% (d) 100 wt%. (700 °C for 1 h under argon)

Phase purity of  $\text{LiVPO}_4\text{F}$  strongly depends on the amount of PTFE in the sample. 5 and 15 wt% of PTFE in the samples was not enough to suppress formation of impurity phases and 100 wt% of PTFE was too much to obtain phase pure  $\text{LiVPO}_4\text{F}$  leading to unidentified impurity phases that can be byproducts of PTFE decomposition.

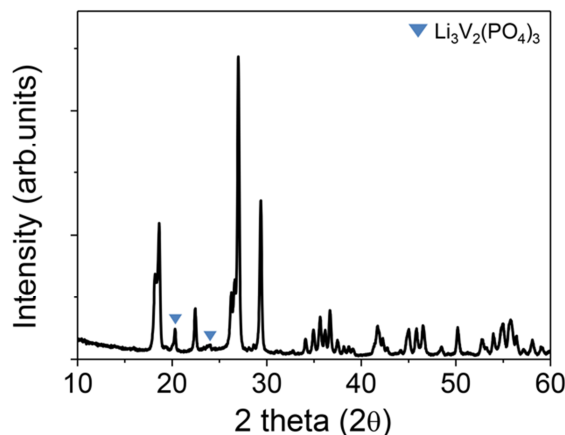

**Figure S4.** X-ray diffraction patterns of  $\text{LiVPO}_4\text{F}$  synthesized by CTR process.  $\text{Li}_3\text{V}_2(\text{PO}_4)_3$  impurity exists.

**Table S1.** Structural parameters obtained from Rietveld refinement of neutron diffraction pattern from  $\text{LiVPO}_4\text{F}$  synthesized by single-step process with PTFE (25 wt%). (700 °C for 1 h under argon)

| Space group: P-1, Z=2                                                                       |              |              | $R_f = 1.36$              |
|---------------------------------------------------------------------------------------------|--------------|--------------|---------------------------|
| $a = 5.1726 (4) \text{ \AA}$ , $b = 5.3082 (3) \text{ \AA}$ , $c = 7.2612 (5) \text{ \AA}$  |              |              | $R_{\text{braag}} = 2.28$ |
| $\alpha = 107.5971 (6)^\circ$ , $\beta = 107.9643 (2)^\circ$ , $\gamma = 98.4061 (5)^\circ$ |              |              | $\text{Chi}^2 = 5.92$     |
| $V = 174.365 \text{ \AA}^3$                                                                 |              |              |                           |
|                                                                                             | x            | y            | z                         |
| V1                                                                                          | 0.00000(0)   | 0.00000(0)   | 0.00000(0)                |
| V2                                                                                          | 0.00000(0)   | 0.00000(0)   | 0.50000(0)                |
| P                                                                                           | 0.32320(87)  | 0.64468(82)  | 0.25487(71)               |
| O1                                                                                          | 0.37052(60)  | 0.23868(55)  | 0.58512(46)               |
| O2                                                                                          | 0.10648(72)  | -0.33062(68) | 0.36174(49)               |
| O3                                                                                          | 0.69842(71)  | 0.65649(64)  | -0.13517(56)              |
| O4                                                                                          | 0.27216(78)  | 0.79624(73)  | 0.09621(49)               |
| F                                                                                           | -0.11003(80) | 0.08701(65)  | 0.24565(55)               |
| Li                                                                                          | 0.70790(270) | 0.35916(358) | 0.22114(234)              |

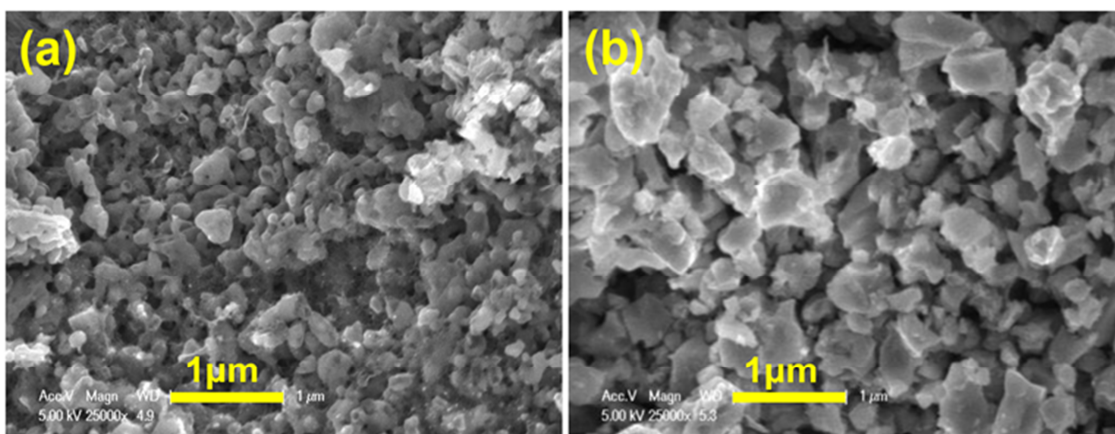

**Figure S5.** SEM images of the sample synthesized at different amount of stearic acid (a) carbon-coated  $\text{LiVPO}_4\text{F}$  using stearic acid 5wt% (b) bare  $\text{LiVPO}_4\text{F}$  without stearic acid. Both of them were synthesized by scalable single-step process with PTFE (25 wt%). After performing the carbon coating, particle size decreases from 200 - 600 nm (bare) to 50 - 200 nm.

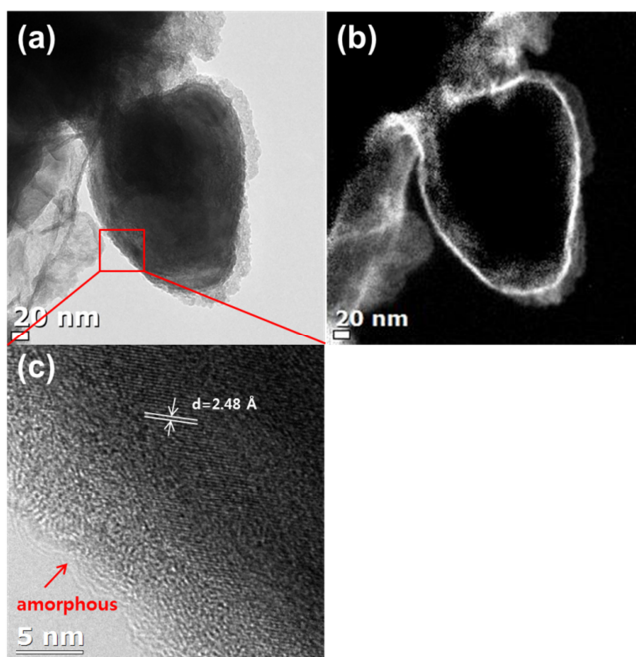

**Figure S6.** (a) TEM image of carbon-coated  $\text{LiVPO}_4\text{F}$  synthesized by PTFE process (b) EELS mapping image of carbon layer. Carbon is well coated on the surface of submicron particles. (c) HR-TEM image. It shows amorphous carbon layer and lattice fringe of  $\text{LiVPO}_4\text{F}$ .

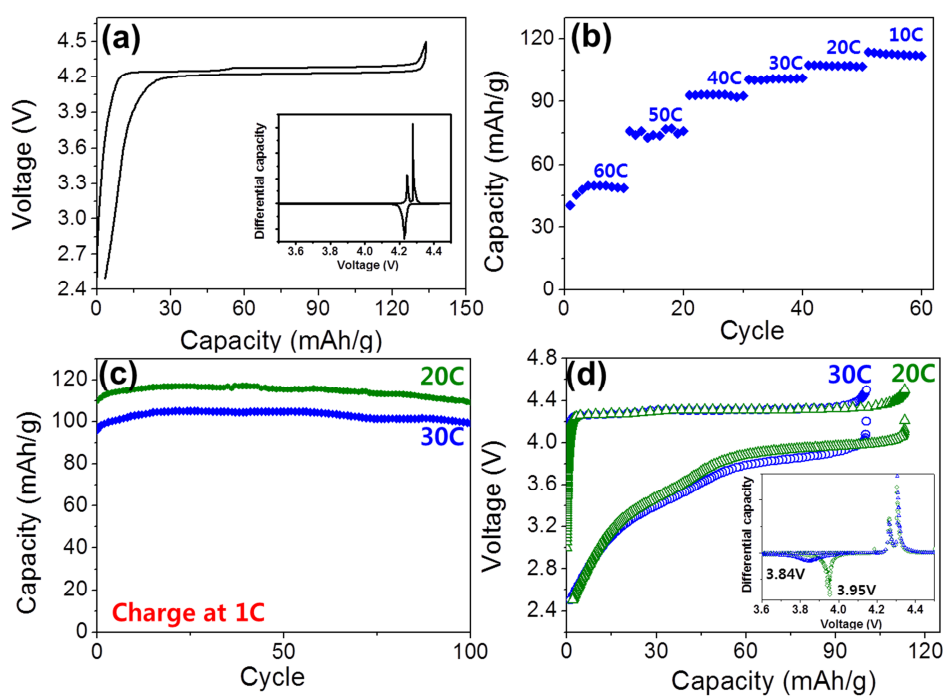

**Figure S7.** (a) Voltage profile of bare- $\text{LiVPO}_4\text{F}$  at C/10; (Inset: differential capacity ( $dQ/dV$ ) plot of the voltage profile) (b) Rate capability at various discharge rates of bare- $\text{LiVPO}_4\text{F}$  (the cell was charged at 1C rate and discharged at various rates) (c) Capacity retention of bare- $\text{LiVPO}_4\text{F}$  at high discharge rates such as 20 C and 30 C rate when the cell was charged at 1C rate. (d) The voltage profiles of 2<sup>nd</sup> cycle in capacity retention test. Cut-off voltage was 2.5 V-4.5 V. (Inset: differential capacity ( $dQ/dV$ ) plot of the voltage profiles at 20C and 30C rate).

Average working potentials at 20C and 30C discharge rate were higher than 3.45V,  $\sim 3.95$  V for 20C and  $\sim 3.84$  V at 30 C rate. For fabrication of the electrode, the ratio of the electrode was  $\text{LiVPO}_4\text{F}$ : carbon black (super P): binder (PVDF) = 80 :15 :5 (wt%). Loading density of electrode was  $\sim 2$  mg/cm<sup>2</sup>.

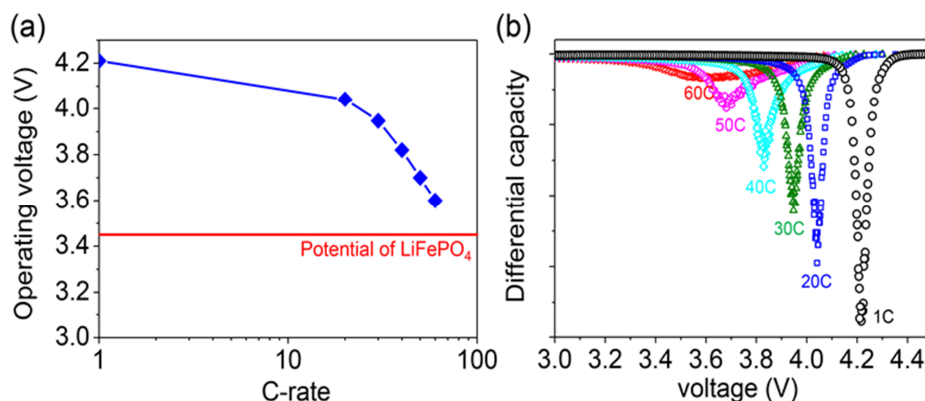

**Figure S8.** (a) Average operating voltages of carbon-coated  $\text{LiVPO}_4\text{F}$  sample synthesized by PTFE process depending on different discharge rates. (b) Differential capacity ( $dQ/dV$ ) plots of the discharge voltage profiles of carbon-coated  $\text{LiVPO}_4\text{F}$  sample at various C-rates. The operating voltage ( $\sim 3.6\text{V}$ ) of carbon-coated  $\text{LiVPO}_4\text{F}$  even at 60 C rate (1 min discharge) was much higher than 3.45V, the redox potential of  $\text{LiFePO}_4$ . This high operating potential with comparable capacity enables  $\text{LiVPO}_4\text{F}$  to have higher energy density than  $\text{LiFePO}_4$  at the same rate. (Voltage profiles from rate capability test in Fig. 6c)

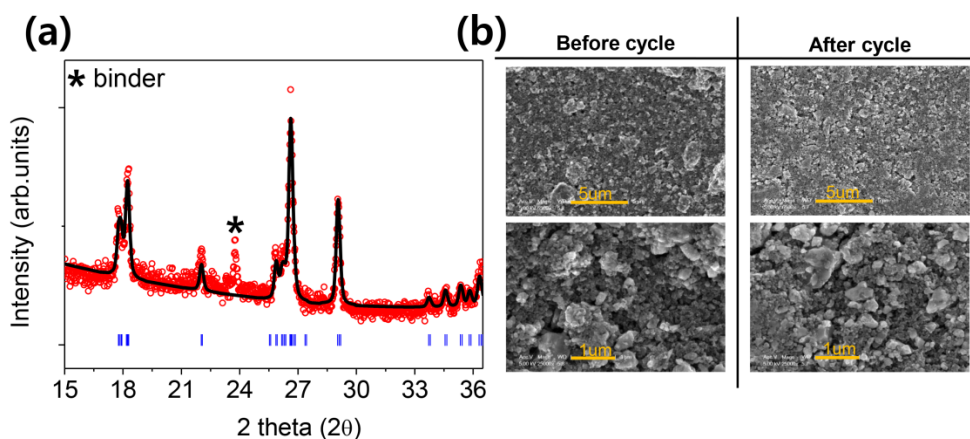

**Figure S9.** Cycle retention test of C-coated  $\text{LiVPO}_4\text{F}$  at 10 C charge/10 C discharge. Other electrode was tested and it is confirmed stable cycle retention with similar capacity (a) XRD pattern and (b) SEM images of the electrode before and after 500 cycles.
